# Supplementary material for: Solvent-controlled structural diversity observed in three Cu(ii) MOFs with a 2,2′-dinitro-biphenyl-4,4′-dicarboxylate ligand: synthesis, structures and magnetism
Source: Royal Society of Chemistry journal article supplement (doi:10.1039/c5ra10459a), 2015-01-01
Supplement: c5ra10459a1.pdf [file c5ra10459a1.pdf]

## Supporting Information

### Solvent-controlled Structural Diversity Observed in three Cu(II) MOFs with 2,2'-dinitro-biphenyl-4,4'-dicarboxylate Ligand: Synthesis, Structures and Magnetism

Na Zhang, Jian-Yong Zhang\*, Qin-Xiang Jia, Wei Deng, and En-Qing Gao\*

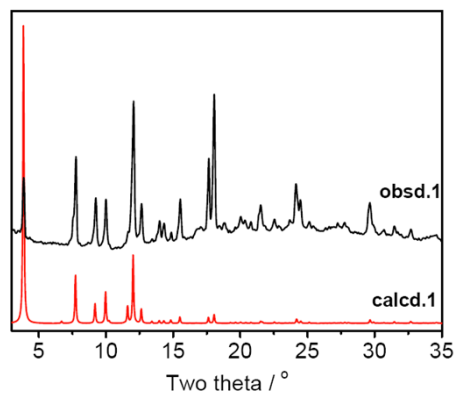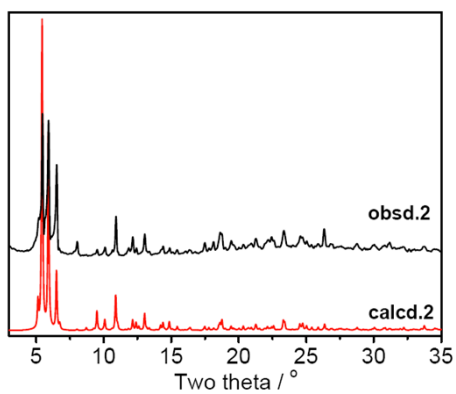

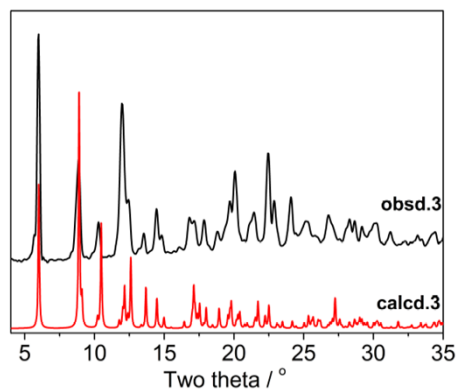

Figure S1. The experimental PXRD and calculated patterns from crystal data for compounds 1-3.

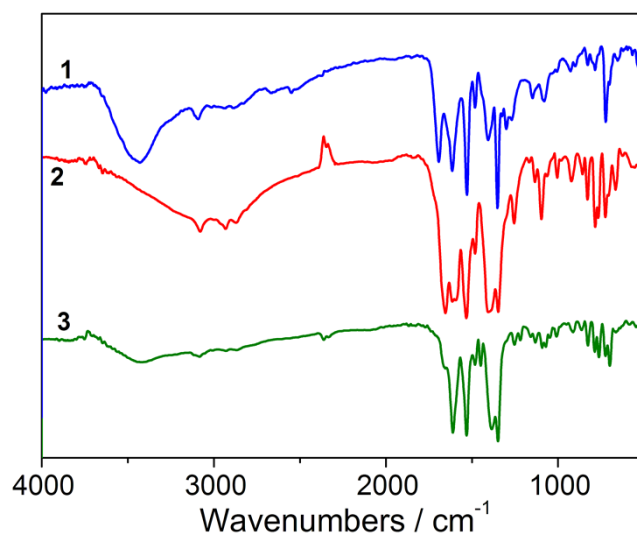

Figure S2. The FT-IR spectrum of compounds 1-3 .

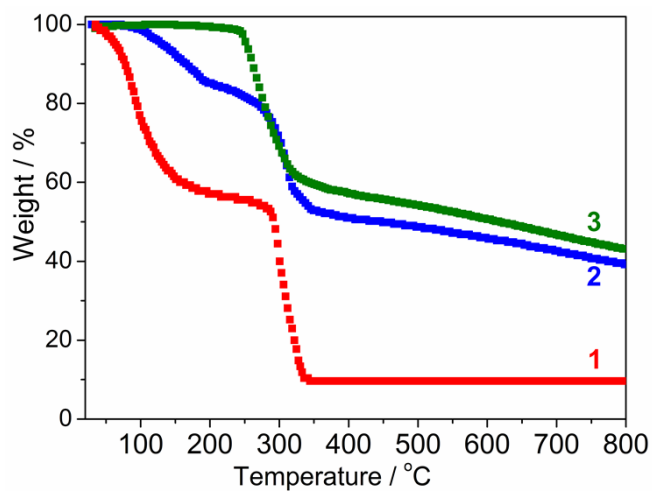

Figure S3. The TGA curves for compounds **1-3**. Compound **1** shows a rapid weight loss (46.3%) below 200°C, corresponding to the release of all four DMA and two water guest molecules per formula unit (calcd. 48.3%) and the framework finally collapsed from 255°C. Compound **3** shows no obvious weight loss until 190 °C, which is consistent with the absence of solvent molecules in the structure.

Table S1. Selected bond lengths [Å] and angles [°] for compound **1**.

|                                                                                                                             |            |             |            |
|-----------------------------------------------------------------------------------------------------------------------------|------------|-------------|------------|
| Cu1-O1                                                                                                                      | 1.9533(18) | Cu1-O2C     | 1.9448(18) |
| Cu1-O3B                                                                                                                     | 1.9436(18) | Cu1-O4A     | 1.9515(18) |
| Cu1-OW1                                                                                                                     | 2.115(3)   | Cu1E-O3     | 1.9439(18) |
| O4A-Cu1-O3B                                                                                                                 | 167.87(9)  | O4A-Cu1-O1  | 90.19(11)  |
| O3B-Cu1-O1                                                                                                                  | 88.99(11)  | O4A-Cu1-O2C | 88.93(11)  |
| O3B-Cu1-O2C                                                                                                                 | 89.33(11)  | O1-Cu1-O2C  | 167.77(9)  |
| O4A-Cu1-OW1                                                                                                                 | 94.17(12)  | O3B-Cu1-OW1 | 97.95(12)  |
| O1-Cu1-OW1                                                                                                                  | 94.13(12)  | O2C-Cu1-OW1 | 98.09(12)  |
| Symmetry codes: A y, -x+y, -z; B -y+1/3, x-y+2/3, z+2/3; C -x+1/3, -y+2/3, -z+2/3; D x-y, x, -z; E -x+y-1/3, -x+1/3, z-2/3. |            |             |            |

Table S2. Selected bond distances [Å] and angles [°] for compound **3**.

|            |            |            |           |
|------------|------------|------------|-----------|
| Cu1-N1     | 1.978(4)   | Cu2-N2     | 1.997(4)  |
| Cu2-O1     | 1.950(3)   | Cu2-O5     | 2.198(4)  |
| Cu1-O6     | 1.913(3)   | Cu1-O7     | 1.956(5)  |
| Cu2-O7     | 1.986(4)   | Cu1-O7A    | 1.951(4)  |
| Cu2-O4B    | 2.000(3)   |            |           |
| O6-Cu1-O7A | 168.71(18) | O7A-Cu1-O7 | 81.53(16) |

|            |            |            |            |
|------------|------------|------------|------------|
| O6-Cu1-O7  | 93.26(15)  | O6-Cu1-N1  | 93.98(17)  |
| O7A-Cu1-N1 | 93.93(18)  | O7-Cu1-N1  | 162.08(18) |
| O1-Cu2-O7  | 93.48(16)  | O1-Cu2-O4B | 171.12(17) |
| O7-Cu2-O4B | 88.22(15)  | O1-Cu2-N2  | 88.66(17)  |
| O7-Cu2-N2  | 173.31(18) | O4B-Cu2-N2 | 88.71(17)  |
| O1-Cu2-O5  | 90.75(17)  | O7-Cu2-O5  | 91.65(17)  |
| O4B-Cu2-O5 | 97.92(16)  | N2-Cu2-O5  | 94.65(17)  |

Symmetry codes: A  $-x+3/2, -y+3/2, -z+1$ ; B  $x, -y+2, z-1/2$ .

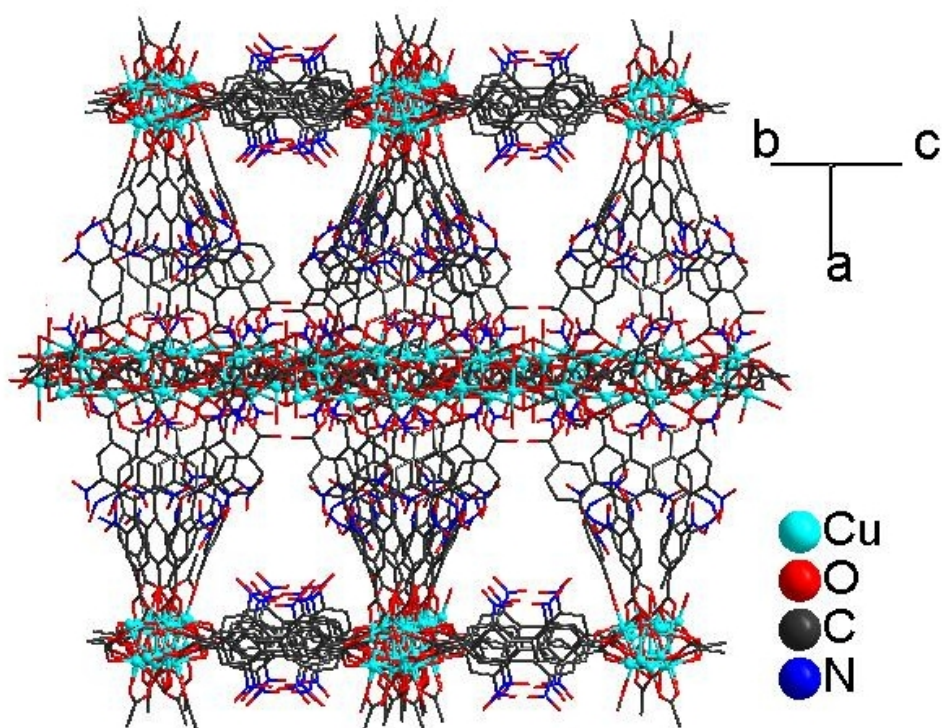

Figure S4. View of the 3D frameworks in compound 2.
